# Supplementary material for: Predictive models for active suicidal ideation in cognitive decline: identifying risk factors
Source: Research Square preprint supplement (doi:10.21203/rs.3.rs-6727886/v1), 2025-09-30
Supplement: Supplementary file 1 [file 604494168797a5a4be624164.docx]

Predictive models for active suicidal ideation in cognitive decline: identifying risk factors

Eva Vidovič MD 1,4, Jernej Rudi Finžgar MSc 2, Anja Kokalj Palandacic MD 1 , Polona Rus Prelog MD PhD3, 1, 5

1 University Psychiatric Clinic Ljubljana, Centre for Clinical Psychiatry, Chengdujska cesta 45, 1260 Ljubljana, Slovenia

2 Technical University Munich, School of CIT, Department of Computer Science, Boltzmanstraße 15, 85748 Garching, Germany 
3 Faculty of Medicine, University of Ljubljana, Vrazov trg 2, 1000 Ljubljana, Slovenia

4 Present address: Max Planck Institute of Psychiatry, Kraepelinstrasse 10, 80804 Munich, Germany

5 Corresponding author: Polona Rus Prelog, Faculty of Medicine, University of Ljubljana, Vrazov trg 2, 1000 Ljubljana, Slovenia, email: polona.rus@psih-klinika.si

Supplementary Material

|  | ROC AUC | PR AUC |
| --- | --- | --- |
| Diagnosis | 0,58 | 0,27 |
| Depressive symptoms | 0,70 | 0,46 |
| Duration Dx | 0,59 | 0,45 |
| Duration SxS | 0,67 | 0,36 |
| MMSE score | 0,64 | 0,14 |
| CDT score | 0,45 | 0,13 |
| ADMs | 0,58 | 0,49 |
| Somatic comorbidities | 0,65 | 0,21 |
| Pain | 0,57 | 0,31 |
| Past SA | 0,56 | 0,32 |
| Affective disorder | 0,58 | 0,30 |
| Substance abuse | 0,56 | 0,26 |
| DEMMI [x/100] | 0,50 | 0,17 |
| STS | 0,45 | 0,10 |

Table S1 Discriminatory performance of single predictors for active suicidal ideation. This table summarizes the discriminatory performance of single predictors for active suicidal ideation (ASI), assessed using ROC AUC and PR AUC values. Most values show limited discriminatory power with ROC AUC values below 0.7.
Abbreviations Duration Dx, duration since diagnosis; Duration SxS, duration since onset of cognitive-decline; MMSE score, Mini Mental State Exam; CDT, Clock Drawing Test; ADMs, anti-dementia medication; SA, suicide attempt; DEMMI, de Morton Mobility Index; STS, Sit-to-Stand Test.

Figure S1 Distribution of key variables associated with active suicidal ideation in univariate analysis. This figure illustrates the distribution of key variables associated with active suicidal ideation (ASI; red). No suicidal ideation or passive suicidal ideation (NPSI) are represented in blue.
Abbreviations Dx, type of cognitive decline; MCI, mild cognitive impairment; AD, Alzheimer’s disease; VD, vascular dementia; UD, unspecified dementia; MMSE score, Mini Mental State Exam; CDT, Clock Drawing Test; Duration Dx, duration since diagnosis of cognitive decline; Duration SxS, duration since onset of cognitive-decline; ADMs, anti-dementia medication; SA, suicide attempt; DEMMI, de Morton Mobility Index; STS, Sit-to-Stand Test.
